# Supplementary material for: Comparative Analysis of Untargeted Metabolomics in Tolerant and Sensitive Genotypes of Common Bean (Phaseolus vulgaris L.) Seeds Exposed to Terminal Drought Stress
Source: Metabolites. 2022 Oct 5;12(10):944. doi: 10.3390/metabo12100944 (PMC9607437; doi:10.3390/metabo12100944)
Supplement: Supplementary file 1 [file metabolites-12-00944-s001.zip]

Archive with 7 entries (7 files):
- Figures 1-5.pdf
- Table S1.pdf
- Table S2.pdf
- Table S3.xlsx
- Table S4.xlsx
- Table S5 .xlsx
- Table S6.xlsx
