# Supplementary material for: Comparative Analysis of Untargeted Metabolomics in Tolerant and Sensitive Genotypes of Common Bean (Phaseolus vulgaris L.) Seeds Exposed to Terminal Drought Stress
Source: Metabolites. 2022 Oct 5;12(10):944. doi: 10.3390/metabo12100944 (PMC9607437; doi:10.3390/metabo12100944)

**Figure S1** Genotypes comparisons

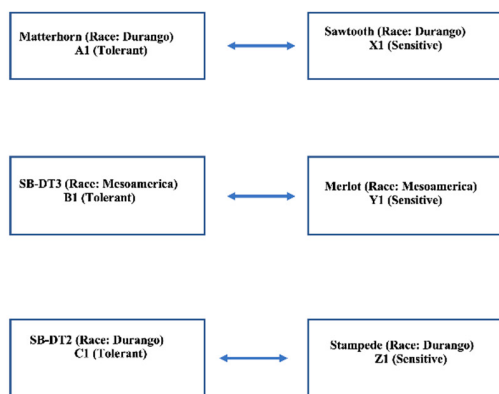

**Figure S2** Flowchart of experimental design

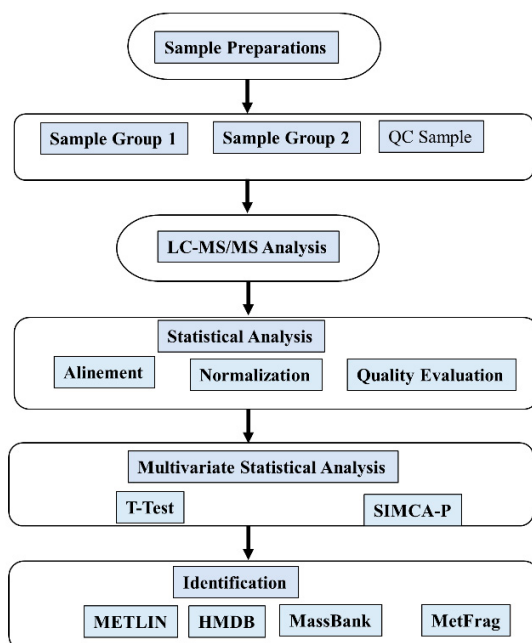

**Figure S3** Estimation of starch, protein contents and lipid percentage of genotypes. Mean values of three biological replicates with standard errors

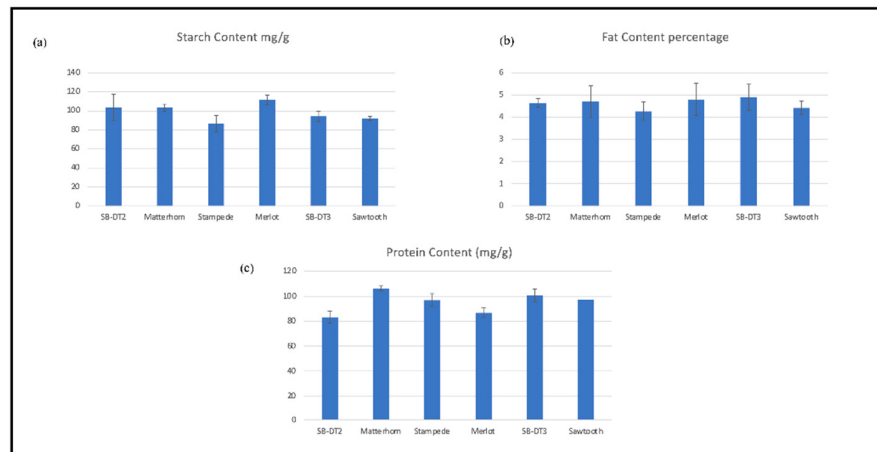

**Figure S4** Comparative accumulation of metabolites across genotypes with a fold change > 2. Yellow indicates the common metabolites identified across genotypes. Green indicates the specific metabolites identified in each comparison

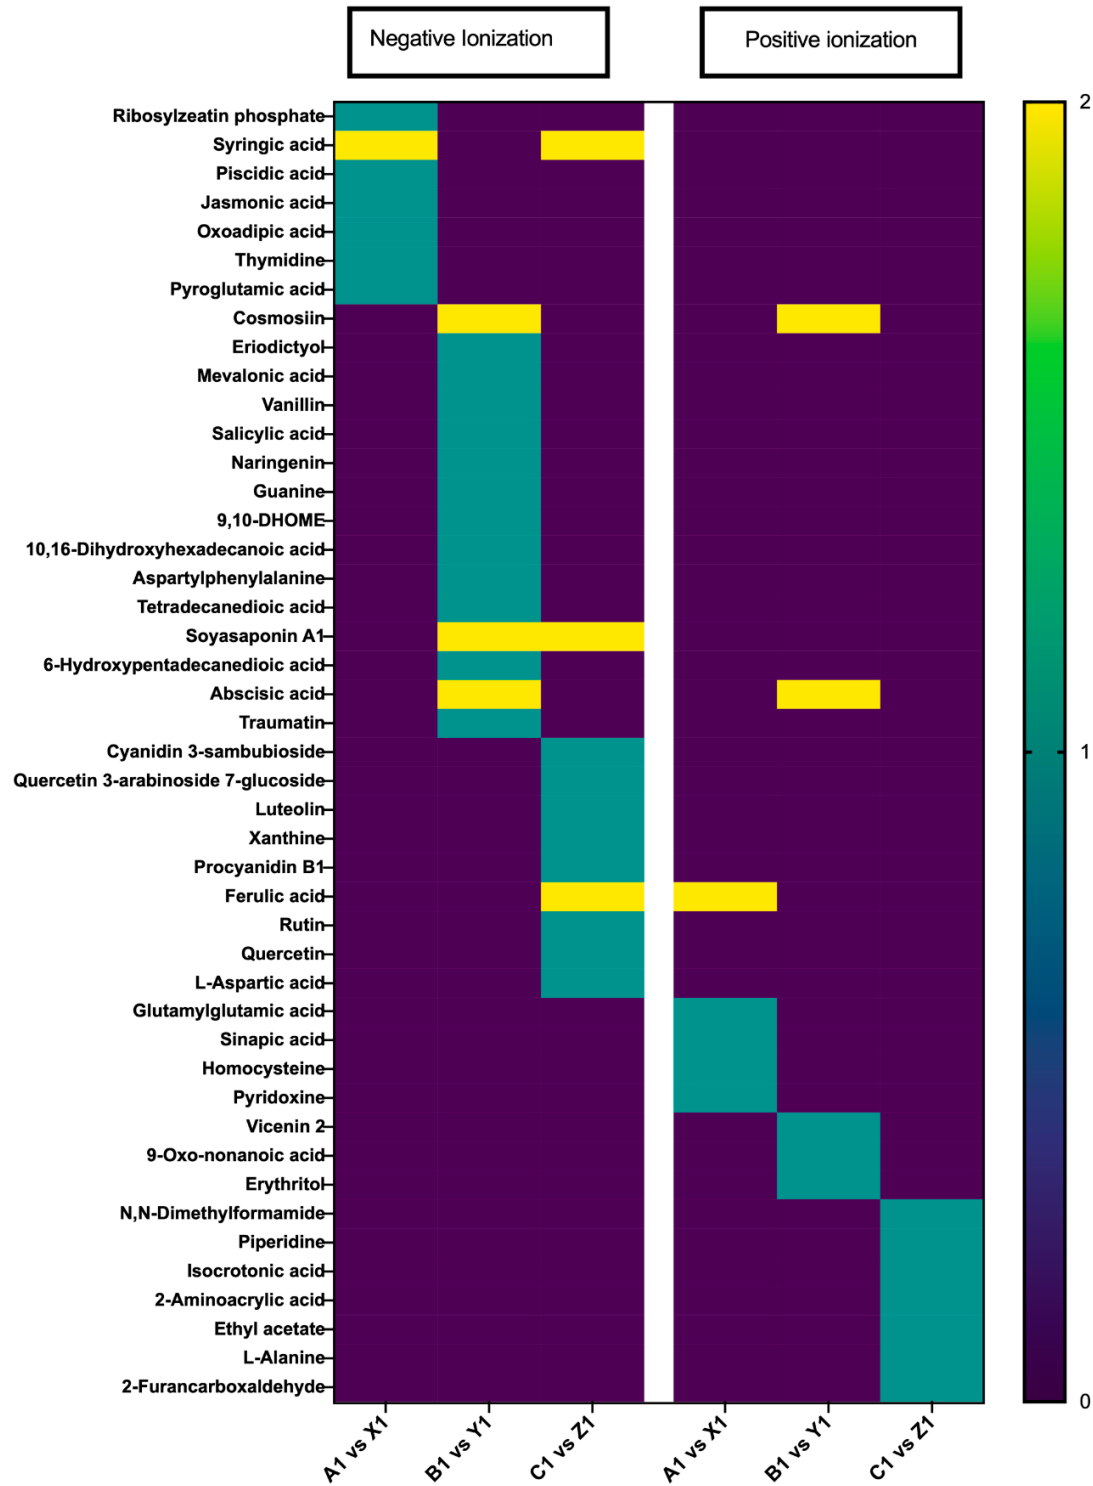

**Figure S5** PLS-DA and OPLS-DA score plots of each comparison in both ionization modes showed clear separation of tolerant and sensitive genotypes for each comparison.

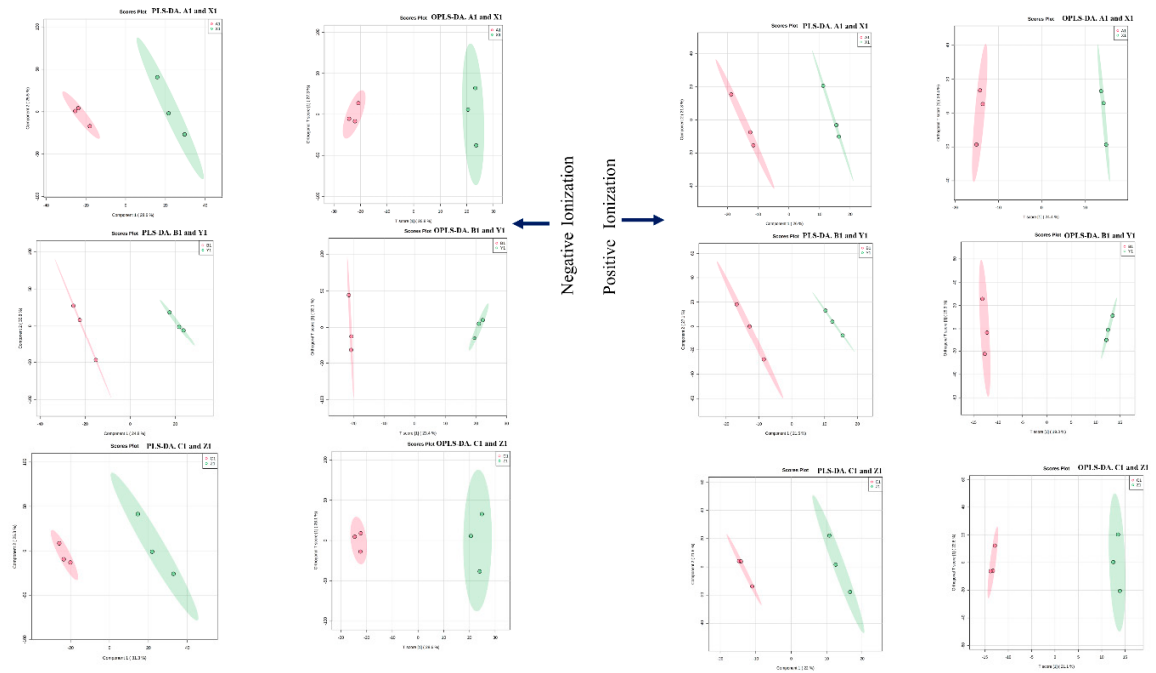

Supplement: Supplementary file 1 [file metabolites-12-00944-s001.zip › Figures 1-5.pdf]
