# Supplementary material for: Comparative Analysis of Untargeted Metabolomics in Tolerant and Sensitive Genotypes of Common Bean (Phaseolus vulgaris L.) Seeds Exposed to Terminal Drought Stress
Source: Metabolites. 2022 Oct 5;12(10):944. doi: 10.3390/metabo12100944 (PMC9607437; doi:10.3390/metabo12100944)
Supplement: Supplementary file 1 [file metabolites-12-00944-s001.zip › Table S1.pdf]

**Table S1**

Listed below are the common bean genotypes and races grown in the field and subjected to terminal drought stress.

| <b>S.NO</b> | <b>PEDIGREE</b> |           | <b>Races</b> |
|-------------|-----------------|-----------|--------------|
| 1           | Matterhorn      | Tolerant  | Durango      |
| 2           | SB-DT2          | Tolerant  | Durango      |
| 3           | SB-DT3          | Tolerant  | Mesoamerica  |
| 4           | Stampede        | Sensitive | Durango      |
| 5           | Swatooth        | Sensitive | Durango      |
| 6           | Merlot          | Sensitive | Mesoamerica  |
