# Supplementary material for: Comparative Analysis of Untargeted Metabolomics in Tolerant and Sensitive Genotypes of Common Bean (Phaseolus vulgaris L.) Seeds Exposed to Terminal Drought Stress
Source: Metabolites. 2022 Oct 5;12(10):944. doi: 10.3390/metabo12100944 (PMC9607437; doi:10.3390/metabo12100944)
Supplement: Supplementary file 1 [file metabolites-12-00944-s001.zip › Table S2.pdf]

**Table S2**

Mean yield (lbs/acre), days to flowering and maturity and 100 seed weight (SW) of the six genotypes evaluated near Scottsbluff, Nebraska, USA.

| <b>PEDIGREE</b> | <b>Yield<br/>lbs/acre</b> | <b>Flowering<br/>days</b> | <b>Maturity<br/>days</b> | <b>100-SW<br/>gr</b> |
|-----------------|---------------------------|---------------------------|--------------------------|----------------------|
| SB-DT2          | 2490                      | 45                        | 87                       | 34.2                 |
| Matterhorn      | 2464                      | 46                        | 82                       | 30.8                 |
| Stampede        | 2416                      | 49                        | 87                       | 34.6                 |
| Merlot          | 2251                      | 48                        | 89                       | 34.6                 |
| SB-DT3          | 1817                      | 47                        | 89                       | 33.2                 |
| Sawtooth        | 1777                      | 46                        | 88                       | 37.3                 |
