# Supplementary material for: Comparative Analysis of Untargeted Metabolomics in Tolerant and Sensitive Genotypes of Common Bean (Phaseolus vulgaris L.) Seeds Exposed to Terminal Drought Stress
Source: Metabolites. 2022 Oct 5;12(10):944. doi: 10.3390/metabo12100944 (PMC9607437; doi:10.3390/metabo12100944)
Supplement: Supplementary file 1 [file metabolites-12-00944-s001.zip › Table S3.xlsx]

## Sheet: Table S3 (Total Metabolites)
Negative ionization										Positive ionization
Metabolite (A1 vs X1)	FC(A1/X1)	T-Test	Metabolite B1 vs Y1	FC(B1/Y1)	T-Test	Metabolite C1 vs Z1	FC(C1/Z1)	T-Test		Metabolite	FC(A1/X1)	T-Test	Metabolite	FC(B1/Y1)	T-Test	Metabolite	FC(C1/Z1)	T-Test
Ribosylzeatin phosphate	3.80601	0.00492049	Cosmosiin	10.4276	0.0424861	Cyanidin 3-sambubioside	17.7701	0.023522		Glutamylglutamic acid	4.69298	0.142357	Cosmosiin	6.76874	0.04652	N,N-Dimethylformamide	9.45268	0.153189
Syringic acid	3.511	0.0695541	Eriodictyol	5.06992	0.00277749	Quercetin 3-arabinoside 7-glucoside	10.1927	0.00478051		Sinapic acid	2.53599	0.143226	Abscisic acid	4.59433	0.17321	Piperidine	5.2946	0.0323885
Piscidic acid	3.32614	0.0874368	Mevalonic acid	3.23617	0.168324	Luteolin	7.87271	0.112414		Homocysteine	2.30533	0.00461284	Vicenin 2	2.6156	0.289151	Isocrotonic acid	3.52764	0.320422
Jasmonic acid	3.18933	0.175959	Vanillin	3.08274	0.00384168	Xanthine	5.5596	0.013579		Pyridoxine	2.04742	0.0383352	9-Oxo-nonanoic acid	2.24054	0.155619	2-Aminoacrylic acid	2.69986	0.0251666
Oxoadipic acid	2.35495	0.480623	Salicylic acid	2.89487	0.102097	Procyanidin B1	5.12094	0.0891833		Ferulic acid	2.02701	0.0166629	Erythritol	2.2344	0.0508905	Ethyl acetate	2.50634	0.0270914
Thymidine	2.20764	0.0705036	Naringenin	2.83842	0.167947	Soyasaponin A1	5.08868	0.00225015		Retinoic acid	1.98577	0.025701	Retinoic acid	1.92983	0.197378	L-Alanine	2.2891	0.313279
Pyroglutamic acid	2.08424	0.00864806	Guanine	2.65945	0.255559	Ferulic acid	4.3552	0.317518		Scoparone	1.89286	0.208256	Eriodictyol	1.90886	0.20181	2-Furancarboxaldehyde	2.19027	0.0687231
Necatorine	1.99804	0.549687	9,10-DHOME	2.48316	0.336653	Rutin	3.13966	0.021123		Linolenic acid	1.77096	0.000994288	L-Valine	1.87671	0.24671	2-Furanmethanol	1.9461	0.33267
Fertaric acid	1.85895	0.280292	10,16-Dihydroxyhexadecanoic acid	2.44917	0.283829	Quercetin	2.51212	0.072445		Argininosuccinic acid	1.61968	0.162746	Glutamylglutamic acid	1.84922	0.374441	Aminocyclopropanecarboxylic acid	1.91318	0.00616435
Ferulic acid	1.83129	0.280995	Aspartylphenylalanine	2.44861	0.322547	L-Aspartic acid	2.3528	0.0518097		Adenine	1.59038	0.154478	Soyasaponin V	1.76145	0.148388	5-Aminopentanal	1.91304	0.0443177
Homocysteine	1.82047	0.00295271	Tetradecanedioic acid	2.39643	0.3741	Syringic acid	2.24071	0.00928463		Glutamylmethionine	1.58871	0.0135822	Itaconic acid	1.73845	0.0400123	3-Aminobutanoic acid	1.86897	0.34313
Homovanillic acid	1.77748	0.361207	Soyasaponin A1	2.30293	0.470042	Adipic acid	1.98207	0.0404733		Oxoglutaric acid	1.4385	0.115334	Azelaic acid	1.70814	0.287304	L-Serine	1.64216	0.114895
Glutamylserine	1.76825	0.283394	6-Hydroxypentadecanedioic acid	2.251	0.511558	Sinapic acid	1.90534	0.235355		Uracil	1.43333	0.41376	Nicotinic acid	1.65104	0.110942	Histamine	1.63736	0.430817
N-Acetyl-L-glutamate 5-semialdehyde	1.75987	0.015093	Abscisic acid	2.18761	0.194094	Cyanidin 3-(6''-malonylglucoside)	1.81274	0.392198		Asarone	1.39359	0.25554	Argininosuccinic acid	1.6504	0.127108	Uracil	1.62675	0.0703065
2-Ketobutyric acid	1.72221	0.16743	Traumatin	2.01177	0.431365	Camphoric acid	1.72211	0.222331		Glutamylserine	1.34162	0.134267	Methionine sulfoxide	1.5757	0.213223	L-Proline	1.60397	0.563954
Vanillic acid	1.59829	0.17757	9(S)-HPODE	1.87947	0.190405	Quercetin 3-(6''-acetylglucoside)	1.69244	0.284582		gamma-Glutamyltyrosine	1.33938	0.159265	9,10-DHOME	1.57421	0.381784	L-Valine	1.5701	0.567131
Ascorbalamic acid	1.58242	0.0323225	Corchorifatty acid F	1.85598	0.178971	Kaempferol 3-(6-acetylgalactoside)	1.6763	0.426607		Guanine	1.31981	0.471136	Pyroglutamic acid	1.46063	0.137088	L-Threonine	1.55885	0.275257
Quercetin 3-(6''-acetylglucoside)	1.57007	0.472762	Cerebronic acid	1.82614	0.284211	Ribosylzeatin phosphate	1.66346	0.0118251		Niacinamide	1.29505	0.659358	L-Serine	1.45365	0.239214	Benzoic acid	1.47803	0.0270099
Imperatorin	1.53738	0.2947	6-Phosphogluconic acid	1.82074	0.00864584	Quercetin 3-(6''-malonyl-glucoside)	1.63012	0.237719		Guanosine	1.2799	0.424341	L-Threonine	1.43826	0.0428757	Niacinamide	1.4738	0.0275301
Dicumarol	1.53547	0.28551	Isopropylmaleic acid	1.80808	0.303153	Eriodictyol	1.43356	0.369026		Citric acid	1.26847	0.0445876	L-Alanine	1.40899	0.0536238	Erythritol	1.37143	0.442944
Argininosuccinic acid	1.52561	0.189654	Garcinia acid	1.80355	0.284606	D-Glucuronic acid	1.42862	2.05454e-06		Indole-3-carboxaldehyde	1.24535	0.0587756	2-Aminoacrylic acid	1.39848	0.0508058	Nicotinic acid	1.36068	0.414254
Glutamylglutamic acid	1.52367	0.142896	Traumatic acid	1.76777	0.0755854	Piscidic acid	1.38458	0.35107		Luteolin	1.23549	0.620317	Glutamylserine	1.36258	0.0623282	5-Hydroxymethyl-2-furaldehyde	1.34725	0.700119
D-Glucuronic acid	1.5177	0.0170194	Glucose 6-phosphate	1.76738	0.212847	Ophthalmic acid	1.37278	0.10466		9-Oxo-nonanoic acid	1.22168	0.410459	Vanillin	1.35142	0.398563	Furaneol	1.32828	0.237355
Vanilloloside	1.48974	0.0775219	Glutamylglutamic acid	1.72789	0.092325	Glutamylmethionine	1.36017	0.471074		Trehalose	1.21726	0.0999427	Stearidonic acid	1.31269	0.393198	Pyroglutamic acid	1.29422	0.0968956
Glutamylmethionine	1.45458	0.161449	Adipic acid	1.69489	0.191625	p-Coumaric acid	1.30898	0.202672		D-Fructose	1.21705	0.039823	Piperidine	1.29107	0.0738498	Pipecolic acid	1.27875	0.232027
Fumaric acid	1.43293	0.354594	Methylmalonic acid	1.66797	0.0541049	Soyasaponin V	1.29172	0.474504		L-Tyrosine	1.21232	0.843686	3-Oxododecanoic acid	1.22623	0.496594	Itaconic acid	1.26758	0.424641
Guanosine	1.39062	0.342776	Methyl jasmonate	1.6299	0.28658	N-Acetyl-L-glutamic acid	1.28465	0.589153		Itaconic acid	1.21134	0.231381	Pyridoxine	1.21322	0.510255	3-Methylcyclohexanethiol	1.21824	0.633406
6-Hydroxyhexanoic acid	1.38484	0.283228	Argininosuccinic acid	1.62895	0.130461	Jasmonic acid	1.27602	0.80136		Benzoic acid	1.20484	0.132674	Homocysteine	1.20487	0.283352	N-Acetyl-L-alanine	1.18018	0.415951
Glucoliquiritin apioside	1.35678	0.648637	Soyasaponin V	1.59587	0.159596	Benzoic acid	1.19528	0.644989		9,10-DHOME	1.20175	0.608015	Aminocyclopropanecarboxylic acid	1.20268	0.0717181	L-Leucine	1.17491	0.00947249
Formononetin	1.34018	0.104553	Linamarin	1.57134	0.0878523	L-Arginine	1.19067	0.808653		Uridine	1.18834	0.187392	gamma-Glutamyltyrosine	1.1972	0.184262	Glutaric acid	1.16005	0.128151
Glyceric acid	1.33503	0.613246	Azelaic acid	1.55836	0.229674	Vanillin	1.18683	0.791036		L-Histidine	1.1834	0.576392	L-Lysine	1.1944	0.438038	L-Asparagine	1.15638	0.323894
L-Glutamic acid	1.33316	0.22421	Dodecanedioic acid	1.549	0.324912	Pimelic acid	1.17592	0.421653		Phytosphingosine	1.17156	0.315666	2-Furanmethanol	1.18926	0.22982	L-Aspartic acid	1.14284	0.2503
6-Phosphogluconic acid	1.31098	0.334901	Terephthalic acid	1.53075	0.46559	Glucoliquiritin apioside	1.17343	0.667944		trans-Aconitic acid	1.16813	0.564885	L-Proline	1.18925	0.248386	Benzothiazole	1.14214	0.448347
Xanthosine	1.30426	0.21161	Piscidic acid	1.52521	0.233991	Nicotinic acid	1.15927	0.716728		Salicylic acid	1.16362	0.0790459	Glutamylmethionine	1.17619	0.376215	Homocysteine	1.13393	0.717728
2-Isopropylmalic acid	1.26429	0.499095	L-Glutamic acid	1.52343	0.261173	L-Valine	1.10788	0.299449		5-Aminopentanal	1.14369	0.396077	DL-o-Chlorophenylalanine	1.15701	0.267273	Adenine	1.12798	0.486411
Threonic acid	1.22616	0.499038	3-Hydroxynonanoic acid	1.51546	0.257531	Methylmalonic acid	1.10758	0.682621		Erythritol	1.14291	0.683356	Cinnamic acid	1.13615	0.359549	Trigonelline	1.11225	0.585276
9,10-DHOME	1.22494	0.586034	Methyl acetate	1.4702	0.270002	Vanilloloside	1.09285	0.267162		Procyanidin	1.14098	0.0853381	Tryptophan	1.1322	0.753196	Salicylic acid	1.10787	0.535232
Ribose-1-arsenate	1.20093	0.140317	Avicularin	1.45427	0.360355	Shikimic acid	1.09015	0.814862		Homoglutathione	1.1312	0.649553	Indoleacrylic acid	1.11911	0.771008	Indole-3-carboxaldehyde	1.10338	0.64292
2-Furoic acid	1.18211	0.308535	Sinapic acid	1.39729	0.291451	Retinoic acid	1.07645	0.655097		Monobutylphthalate	1.13036	0.530971	Linoleoyl Ethanolamide	1.11602	0.314839	4-Acetamidobutanoic acid	1.10271	0.301995
L-Proline	1.17632	0.646446	Quercetin 3-arabinoside 7-glucoside	1.39704	0.377266	Cosmosiin	1.07606	0.751338		N,N-Dimethylformamide	1.12576	0.398224	3-Aminobutanoic acid	1.11248	0.550242	Oxoglutaric acid	1.09603	0.726176
Tartaric acid	1.17365	0.589695	Levulinic acid	1.38933	0.0185627	Naringenin	1.07416	0.891059		Benzothiazole	1.11907	0.54119	Trehalose	1.10872	0.338966	Coumarin	1.09279	0.569652
Neohesperidose	1.17265	0.356649	Citramalic acid	1.36583	0.31121	Stearic acid	1.07336	0.829308		Tryptophan	1.11201	0.729843	Cytidine	1.0897	0.75755	Adipic acid	1.08834	0.723242
Oxoglutaric acid	1.1662	0.0679052	Uracil	1.32586	0.742399	5-Hydroxy-L-tryptophan	1.07125	0.675056		Pantothenic acid	1.11198	0.613552	p-Coumaric acid	1.08602	0.517498	L-Lysine	1.0874	0.472694
Sinapic acid	1.15916	0.770339	Glyoxylic acid	1.32365	0.228556	Cortexolone	1.06204	0.641649		Shinflavanone	1.11038	0.666683	L-Leucine	1.07316	0.588826	Cinnamic acid	1.08572	0.729219
gamma-Glutamyltyrosine	1.15272	0.373408	Malic acid	1.31463	0.234335	Pyroglutamic acid	1.05127	0.741546		Indoleacrylic acid	1.10628	0.740113	Glycerophosphocholine	1.07158	0.726487	Thymol	1.07986	0.19663
Oxalacetic acid	1.15264	0.0820176	Pyruvic acid	1.30835	0.386882	L-Asparagine	1.04631	0.894069		DL-o-Chlorophenylalanine	1.10428	0.514565	Nicotine	1.06677	0.851336	Guanine	1.07223	0.753795
Citric acid	1.15083	0.0827449	Undecylenic acid	1.28785	0.374674	Methyl acetate	1.04545	0.885033		Quercetin 3-(6''-malonyl-glucoside)	1.08001	0.288303	Histamine	1.06404	0.790748	Vanillin	1.06978	0.862088
16-Hydroxyhexadecanoic acid	1.13783	0.571614	2-Ketobutyric acid	1.27159	0.650702	2-Furoic acid	1.0406	0.760274		5-Hydroxymethyl-2-furaldehyde	1.07897	0.291649	Adenosine	1.06069	0.415058	L-Histidine	1.06386	0.913694
10,16-Dihydroxyhexadecanoic acid	1.12735	0.740586	2-Isopropylmalic acid	1.25216	0.492956	Gallic acid	1.03949	0.838734		Coumarin	1.07575	0.795431	Coumarin	1.05768	0.866976	Phosphoglycolic acid	1.04199	0.630623
Pipecolic acid	1.12728	0.431844	Oxoadipic acid	1.24543	0.670603	Sorbitan laurate	1.03587	0.947716		Azelaic acid	1.07281	0.845352	Scoparone	1.05041	0.821751	Nicotine	1.03768	0.751525
Isopropylmaleic acid	1.12647	0.701418	Dicumarol	1.23328	0.180975	Epicatechin-3-gallate	1.03567	0.804883		Linoleoyl Ethanolamide	1.06791	0.718409	5-Hydroxymethyl-2-furaldehyde	1.04145	0.847537	p-Coumaric acid	1.03644	0.745401
Linamarin	1.12511	0.769755	N-Acetyl-L-alanine	1.21219	0.169936	6-Phosphogluconic acid	1.03503	0.929632		Traumatin	1.06788	0.592069	5-Aminopentanal	1.03745	0.764016	Methionine sulfoxide	1.03102	0.884889
Citraconic acid	1.12066	0.674076	Uridine 5'-monophosphate	1.20929	0.449929	6-Hydroxyhexanoic acid	1.02619	0.94874		gamma-Undecalactone	1.06603	0.284357	Traumatin	1.02365	0.860901	L-Phenylalanine	1.02993	0.886442
N-Acetyl-L-glutamic acid	1.11685	0.667356	Threonic acid	1.20873	0.356243	Levulinic acid	1.01936	0.93863		Thymol	1.06472	0.647199	Uridine	1.01721	0.850808	Pyridoxal	1.02832	0.726797
Lactitol	1.11024	0.344035	Pipecolic acid	1.20392	0.487881	Ribose-1-arsenate	1.01715	0.904173		Vicenin 2	1.0543	0.411746	Ferulic acid	1.0171	0.788744	Geranic acid	1.02789	0.863765
Pimelic acid	1.09837	0.635725	L-Threonine	1.19135	0.0567681	Oleic acid	1.0147	0.966324		Glycerophosphocholine	1.04852	0.881192	Phosphohydroxypyruvic acid	1.00913	0.920299	Pyridoxine	1.0218	0.919253
Uridine	1.06702	0.615536	Glutamine	1.18743	0.55705	Quinic acid	1.01061	0.918561		Pipecolic acid	1.04077	0.712581	Threonylserine	1.00723	0.977465	Diphenylamine	1.0204	0.962088
L-Histidine	1.05377	0.852884	3-Oxododecanoic acid	1.18568	0.518014	Vanillic acid	1.00768	0.966787		2-Furanmethanol	1.0404	0.78501	Uracil	0.999073	0.995655	9-Oxo-nonanoic acid	1.0176	0.912061
L-Asparagine	1.05374	0.852109	Glutamylmethionine	1.18133	0.544223	Pyruvic acid	1.00763	0.983791		L-Proline	1.03899	0.793499	L-Arginine	0.98906	0.982176	trans-Aconitic acid	1.01315	0.88551
Quinic acid	1.04467	0.775421	Cortexolone	1.17727	0.0647172	Isocrotonic acid	0.997385	0.981111		Diisobutyl phthalate	1.03496	0.783716	N,N-Dimethylformamide	0.986919	0.898865	L-Theanine	1.00999	0.925009
Chlorogenic acid	1.04402	0.780493	Fumaric acid	1.16549	0.472117	Sulfate	0.996212	0.985014		Phosphohydroxypyruvic acid	1.03495	0.78072	Phosphoglycolic acid	0.983511	0.774606	L-Arginine	1.00729	0.945723
p-Coumaric acid	1.04183	0.912909	Luteolin	1.15106	0.683508	Glucaric acid	0.99611	0.949456		Adipic acid	1.03454	0.858788	Benzothiazole	0.982857	0.930657	Allantoic acid	1.00128	0.997559
D-Fructose	1.02918	0.865846	gamma-Glutamyltyrosine	1.14447	0.0324792	Citric acid	0.989362	0.892534		Eriodictyol	1.03277	0.581868	3-Methylcyclohexanethiol	0.972377	0.812697	D-Fructose	1.00014	0.997473
Trehalose	1.02103	0.80653	Sorbitan laurate	1.14022	0.715872	Oxalacetic acid	0.988963	0.888238		Glutaric acid	1.0327	0.942622	Salicylic acid	0.968798	0.951562	L-Tyrosine	0.994517	0.982818
L-Lactic acid	1.01689	0.905932	Shikimic acid	1.13003	0.604216	6-Hydroxypentadecanedioic acid	0.987637	0.979332		Geranic acid	1.03086	0.831719	5-Hydroxy-L-tryptophan	0.965242	0.900485	Phosphohydroxypyruvic acid	0.994272	0.978919
Shinflavanone	1.01474	0.958953	L-Phenylalanine	1.12775	0.491826	Traumatic acid	0.983983	0.953579		3-Methylcyclohexanethiol	1.03076	0.753835	Isocrotonic acid	0.963555	0.890755	gamma-Undecalactone	0.993855	0.923069
Glutaric acid	1.00386	0.973168	Stearic acid	1.12276	0.642982	Suberic acid	0.98391	0.916077		N-Acetyl-L-alanine	1.03065	0.738141	4-Acetamidobutanoic acid	0.961086	0.845172	Indoleacrylic acid	0.977185	0.944695
Pantothenic acid	0.994796	0.980049	L-Methionine	1.11464	0.647874	trans-Aconitic acid	0.981597	0.907998		Furaneol	1.01714	0.98501	Pipecolic acid	0.959844	0.788161	Azelaic acid	0.973377	0.864079
Naringenin	0.994312	0.967077	Cinnamic acid	1.09082	0.680043	10,16-Dihydroxyhexadecanoic acid	0.978118	0.959971		Phosphoglycolic acid	0.999527	0.99555	Diisobutyl phthalate	0.959199	0.723889	N-Acetyl-L-glutamic acid	0.968474	0.814541
Suberic acid	0.986575	0.932342	Oleic acid	1.08848	0.793758	Oxoglutaric acid	0.972673	0.716564		L-Arginine	0.974612	0.959131	Monobutylphthalate	0.956982	0.529719	Citric acid	0.962133	0.787882
L-Arabitol	0.982379	0.934817	Eujambolin	1.08082	0.907192	Linolenic acid	0.967994	0.906496		Diphenylamine	0.973412	0.860436	2-Furancarboxaldehyde	0.956172	0.468314	Ferulic acid	0.956039	0.633844
Luteolin	0.980029	0.956167	Citraconic acid	1.07688	0.72902	Ethyl myristate	0.963191	0.878002		p-Coumaric acid	0.967041	0.811094	Trigonelline	0.955986	0.466194	Neocnidilide	0.946036	0.818928
L-Valine	0.958503	0.750871	Uridine	1.07013	0.519582	Deoxycholic acid	0.958661	0.763149		Pyroglutamic acid	0.959408	0.82363	Benzoic acid	0.953477	0.790279	DL-o-Chlorophenylalanine	0.944195	0.63549
Malic acid	0.957774	0.82919	beta-Glucogallin	1.05407	0.414883	Chlorogenic acid	0.952474	0.802633		Adenosine	0.957678	0.780468	N-Acetyl-L-glutamic acid	0.943998	0.824493	Tryptophan	0.930757	0.63752
N-Acetyl-L-alanine	0.953741	0.725755	Phosphate	1.04855	0.5735	Ascorbalamic acid	0.946877	0.806029		Aminocyclopropanecarboxylic acid	0.950851	0.704031	Sinapic acid	0.939588	0.711429	Scoparone	0.929832	0.504557
Ketoleucine	0.952616	0.903004	L-Leucine	1.04231	0.837813	Aminoadipic acid	0.938325	0.501539		L-Threonine	0.94751	0.698094	Atrazine	0.935077	0.498938	Threonylserine	0.905531	0.915953
Palmitoleic acid	0.952517	0.667665	Pyroglutamic acid	1.02767	0.886781	N-Acetyl-L-glutamate 5-semialdehyde	0.937495	0.520654		L-Asparagine	0.945701	0.850362	Adenine	0.922764	0.809078	Asarone	0.894688	0.567501
Adenine	0.948749	0.768839	Ethyl myristate	1.02095	0.937752	Citramalic acid	0.936847	0.867452		Traumatic acid	0.940315	0.799762	L-Aspartic acid	0.921683	0.657357	Jasmonic acid	0.887844	0.531965
Adenosine	0.947328	0.758658	Ellagic acid	1.02086	0.926469	L-Theanine	0.934672	0.640306		N-Acetyl-L-glutamic acid	0.939209	0.785843	gamma-Undecalactone	0.919891	0.570841	Traumatin	0.887159	0.306873
Indole	0.946415	0.887627	Dibutyl malate	1.01662	0.92145	L-Lactic acid	0.928944	0.439548		Atrazine	0.933424	0.348851	Diphenylamine	0.917387	0.374239	3-Oxododecanoic acid	0.882315	0.83554
Proanthocyanidin A2	0.939884	0.743331	Ketoleucine	1.01583	0.942314	2-Hydroxystearic acid	0.925866	0.627053		Neocnidilide	0.929223	0.511029	Indole-3-carboxaldehyde	0.915898	0.673429	Atrazine	0.867515	0.582583
Methylgallate	0.939581	0.805481	Adenosine	1.01065	0.964044	Cytidine	0.925546	0.497771		L-Lysine	0.925042	0.747468	L-Theanine	0.903052	0.567981	Pantothenic acid	0.86022	0.117862
Floionolic acid	0.938653	0.615922	Trehalose	1.00373	0.974962	Cerebronic acid	0.917448	0.82103		Jasmonic acid	0.923052	0.71413	Neocnidilide	0.898815	0.202536	5-Hydroxy-L-tryptophan	0.86016	0.827839
Maltopentaose	0.937282	0.901814	Linolenic acid	1.00103	0.997016	L-Glutamic acid	0.916893	0.802461		2-Aminoacrylic acid	0.916531	0.573359	D-Fructose	0.89313	0.174881	Monobutylphthalate	0.847227	0.604981
Deoxycholic acid	0.93521	0.80627	Isocrotonic acid	1.00081	0.98405	Ellagic acid	0.914157	0.567856		Threonylserine	0.911291	0.80649	Oxoglutaric acid	0.884777	0.515725	Sinapic acid	0.843597	0.573142
Glyoxylic acid	0.933622	0.731022	Adenine	1.00026	0.999083	Catechin	0.911553	0.371522		L-Leucine	0.842056	0.325658	Phytosphingosine	0.8724	0.477475	Traumatic acid	0.833611	0.728553
L-Threonine	0.931238	0.649168	Thymidine	0.994324	0.984346	9(S)-HPODE	0.909133	0.834415		Stearidonic acid	0.834629	0.643679	Citric acid	0.871131	0.436732	Glutamylserine	0.828931	0.141479
trans-Aconitic acid	0.925834	0.703083	Glyceric acid	0.993829	0.967911	2-Methylcitric acid	0.908648	0.479298		Glutamylleucine	0.832908	0.349698	Geranic acid	0.867791	0.283854	Cytidine	0.828721	0.139388
Tryptophan	0.918884	0.828274	Floionolic acid	0.991326	0.907467	L-Threonine	0.907722	0.667198		Cinnamic acid	0.828017	0.53338	Thymol	0.860772	0.229083	Uridine	0.817092	0.407878
Ethyl myristate	0.918229	0.676507	Gallic acid	0.986554	0.898292	Neohesperidose	0.905495	0.396423		L-Phenylalanine	0.827425	0.531543	Linolenic acid	0.854807	0.525646	Glycerophosphocholine	0.807594	0.504681
Cerebronic acid	0.915188	0.313406	Indole	0.98618	0.956249	Soyasaponin I	0.905412	0.818094		L-Valine	0.817684	0.767637	Quercitrin	0.852746	0.582458	Glutamylleucine	0.802196	0.554623
Isocrotonic acid	0.91317	0.498039	Lactitol	0.975556	0.77079	DL-o-Chlorophenylalanine	0.899363	0.514288		Catechin	0.811666	0.444762	N-Acetyl-L-alanine	0.836068	0.0246583	Abscisic acid	0.800046	0.252096
L-Methionine	0.909901	0.681889	Vanillic acid	0.975144	0.881797	Floionolic acid	0.897682	0.503995		4-Acetamidobutanoic acid	0.787495	0.123942	Asarone	0.832797	0.482529	Adenosine	0.798256	0.226239
2-Methylcitric acid	0.909712	0.618597	Ribose-1-arsenate	0.969944	0.859324	Trehalose	0.896956	0.389133		Quercitrin	0.768633	0.485854	L-Phenylalanine	0.827263	0.668214	Glutamylglutamic acid	0.797816	0.211917
Sulfate	0.90971	0.589723	D-Sedoheptulose 7-phosphate	0.964832	0.735084	Fertaric acid	0.896206	0.831687		Cytidine	0.764154	0.220959	Guanosine	0.816896	0.301436	Stearidonic acid	0.797748	0.362149
Quercetin 3-(6''-malonyl-glucoside)	0.905799	0.857327	2-Hydroxystearic acid	0.964596	0.804601	Glutamylglutamic acid	0.896153	0.725371		Piperidine	0.763181	0.47103	Luteolin	0.810908	0.478255	Glutamylmethionine	0.794193	0.328198
Epicatechin-3-gallate	0.894209	0.410538	Linoleic acid	0.96197	0.888601	4-Acetamidobutanoic acid	0.891403	0.434979		Pyridoxal	0.761186	0.190509	Ethyl acetate	0.803641	0.75545	Diisobutyl phthalate	0.793564	0.324572
L-Arginine	0.889532	0.825696	Tartaric acid	0.958144	0.779194	Eujambolin	0.888357	0.431773		2-Furancarboxaldehyde	0.746781	0.0942554	Catechin	0.788183	0.697547	Linolenic acid	0.792482	0.22068
Rhein	0.887268	0.921878	Sebacic acid	0.95809	0.600553	Quercetin 4'-glucoside	0.883275	0.139202		Trigonelline	0.746204	0.0948476	Jasmonic acid	0.784297	0.421275	Guanosine	0.790776	0.180199
Cytidine	0.884954	0.0689507	Tryptophan	0.955987	0.889073	Uridine	0.882461	0.448022		L-Theanine	0.746123	0.147865	Quercetin 3-(6''-malonyl-glucoside)	0.778227	0.520727	Luteolin	0.783313	0.0241833
Citramalic acid	0.884825	0.3942	4-Acetamidobutanoic acid	0.94653	0.740812	Garcinia acid	0.882052	0.770727		Nicotinic acid	0.740852	0.303322	Guanine	0.773881	0.241526	Eriodictyol	0.736405	0.135165
Quercetin 4'-glucoside	0.88101	0.361448	Oxoglutaric acid	0.945794	0.574366	Palmitoleic acid	0.881442	0.555695		Methionine sulfoxide	0.735147	0.517507	Cyanidin 3-(6''-malonylglucoside)	0.765743	0.44442	Ophthalmic acid	0.735397	0.180209
DL-o-Chlorophenylalanine	0.879739	0.41939	Oxalacetic acid	0.940664	0.542521	L-Histidine	0.877897	0.606968		L-Serine	0.724385	0.314059	Shinflavanone	0.760514	0.409917	Catechin	0.728159	0.0236161
Quercitrin	0.879127	0.360669	Citric acid	0.940427	0.540759	Sebacic acid	0.871885	0.114952		Allantoic acid	0.717442	0.694924	Traumatic acid	0.746529	0.380863	Argininosuccinic acid	0.717256	0.232316
Tetradecanedioic acid	0.874297	0.880927	5-Hydroxy-L-tryptophan	0.938717	0.774955	L-Methionine	0.868846	0.74102		Nicotine	0.710555	0.0187366	L-Tyrosine	0.73393	0.699641	Retinoic acid	0.710316	0.389673
Quercetin	0.872644	0.530293	Gentisic acid	0.935503	0.847227	2-Isopropylmalic acid	0.844083	0.504989		Histamine	0.705239	0.214782	Homoglutathione	0.712881	0.725769	gamma-Glutamyltyrosine	0.710299	0.301691
Glucaric acid	0.870231	0.25501	D-Glucuronic acid	0.932508	0.622609	Glyceric acid	0.84275	0.446222		L-Alanine	0.632135	0.0744994	Niacinamide	0.708096	0.344601	9,10-DHOME	0.705002	0.547145
Gallic acid	0.869236	0.502175	Suberic acid	0.928464	0.602348	Lactitol	0.842517	0.24265		3-Aminobutanoic acid	0.591328	0.507293	L-Asparagine	0.678544	0.35958	Phytosphingosine	0.702433	0.123139
Catechin	0.860683	0.219482	2-Furoic acid	0.928169	0.630566	beta-Glucogallin	0.837783	0.143031		Isocrotonic acid	0.553682	0.269801	L-Histidine	0.672276	0.245558	Homoglutathione	0.650029	0.142082
beta-Glucogallin	0.860238	0.344419	Cytidine	0.926193	0.24378	Azelaic acid	0.828673	0.388645		Rutin	0.544862	0.435426	Soyasaponin I	0.66543	0.094168	Linoleoyl Ethanolamide	0.612054	0.201505
Ellagic acid	0.859628	0.623561	Epicatechin-3-gallate	0.923984	0.604297	N-Acetyl-L-alanine	0.826214	0.641208		Cosmosiin	0.526535	0.334874	Pantothenic acid	0.656932	0.0450231	Trehalose	0.610481	0.187108
Eujambolin	0.854556	0.538822	Necatorine	0.920124	0.573085	Maltopentaose	0.825848	0.833787		Soyasaponin V	0.524453	0.385825	Glutaric acid	0.584993	0.0596226	Shinflavanone	0.608777	0.344786
Linoleic acid	0.854034	0.22201	Imperatorin	0.912294	0.64963	Tartaric acid	0.820158	0.159803		Soyasaponin I	0.506142	0.308637	Glutamylleucine	0.583396	0.113511	Cosmosiin	0.583809	0.204911
9(S)-HPODE	0.850767	0.544682	Aminoadipic acid	0.911578	0.548144	Glutamylserine	0.809174	0.428005		L-Aspartic acid	0.502679	0.317321	Adipic acid	0.532799	0.29777	Quercitrin	0.578794	0.181211
Stearic acid	0.84833	0.557438	Benzoic acid	0.908385	0.292283	Aspartylphenylalanine	0.804805	0.745137		5-Hydroxy-L-tryptophan	0.501552	0.0147042	trans-Aconitic acid	0.521687	0.0536086	Cyanidin 3-(6''-malonylglucoside)	0.561324	0.149496
Methyl jasmonate	0.845986	0.725024	L-Valine	0.907498	0.618356	D-Fructose	0.803606	0.0411748		Cyanidin 3-(6''-malonylglucoside)	0.482019	0.194534	Ophthalmic acid	0.496066	0.0929796	Quercetin 3-(6''-malonyl-glucoside)	0.504699	0.000318464
Vanillin	0.841758	0.752215	Homocysteine	0.902733	0.613629	Linoleic acid	0.802255	0.159371		Ethyl acetate	0.439707	0.141707	Allantoic acid	0.47478	0.136449	Procyanidin	0.472764	0.00689125
4-Acetamidobutanoic acid	0.834925	0.064548	Sulfate	0.89809	0.531146	Ketoleucine	0.798733	0.532244		Abscisic acid	0.383297	0.184525	Rutin	0.384517	0.100564	Vicenin 2	0.435715	0.086073
Salicylic acid	0.834545	0.792396	Glutamylserine	0.888252	0.315314	L-Proline	0.795728	0.0217054		Ophthalmic acid	0.342441	0.0342162	Furaneol	0.368774	0.0830714	Rutin	0.416913	0.320566
Oleic acid	0.83425	0.613746	Xylose	0.886317	0.282069	Glyoxylic acid	0.794015	0.136737		3-Oxododecanoic acid	0.331678	0.339638	Pyridoxal	0.297638	0.206726	Soyasaponin I	0.410693	0.202453
Procyanidin B1	0.820057	0.329636	p-Coumaric acid	0.881786	0.587361	Malic acid	0.785788	0.117955		Vanillin	0.305889	0.162021	Procyanidin	0.282896	0.0105722	Soyasaponin V	0.388236	0.185152
Gluconic acid	0.816976	0.0131054	Gluconic acid	0.881684	0.267526	Citraconic acid	0.782681	0.347248
Xylose	0.816003	0.00886379	Glucaric acid	0.881536	0.306926	Proanthocyanidin A2	0.781013	0.362265
Corchorifatty acid F	0.815351	0.242993	Fertaric acid	0.879977	0.459669	Cinnamic acid	0.779206	0.313803
Xanthine	0.806523	0.763457	Quinic acid	0.874732	0.264597	Glutaric acid	0.770239	0.540923
Sebacic acid	0.799274	0.121334	L-Arginine	0.869617	0.750025	Necatorine	0.766671	0.0112228
Pyruvic acid	0.796394	0.254465	Retinoic acid	0.861122	0.515565	L-Phenylalanine	0.763449	0.285534
Sorbitan laurate	0.794241	0.609736	Pimelic acid	0.85377	0.205145	Methyl jasmonate	0.755705	0.532874
Cortexolone	0.792125	0.0615026	DL-o-Chlorophenylalanine	0.852741	0.326195	Guanine	0.752856	0.27877
Mevalonic acid	0.786707	0.563428	trans-Aconitic acid	0.850374	0.0641621	Guanosine	0.741542	0.0748795
6-Hydroxypentadecanedioic acid	0.777787	0.350932	L-Aspartic acid	0.84887	0.28313	Xylose	0.726551	0.150153
Cyanidin 3-sambubioside	0.770163	0.398092	Ferulic acid	0.841718	0.551413	Gluconic acid	0.725088	0.147795
Undecylenic acid	0.764446	0.628071	Ophthalmic acid	0.839541	0.423352	gamma-Glutamyltyrosine	0.722298	0.187758
L-Leucine	0.750109	0.385789	Chlorogenic acid	0.837038	0.148743	9,10-DHOME	0.721831	0.654553
Phosphate	0.74974	0.00412907	Cyanidin 3-sambubioside	0.826432	0.481411	Phosphate	0.720745	0.0749788
Cosmosiin	0.734346	0.428712	2-Methylcitric acid	0.820148	0.0824042	Adenosine	0.719313	0.287154
Glutamylleucine	0.72262	0.124282	Neohesperidose	0.815216	0.348602	Imperatorin	0.709311	0.365774
2-Hydroxystearic acid	0.717362	0.0994577	N-Acetyl-L-glutamic acid	0.809867	0.445366	Uridine 5'-monophosphate	0.702516	0.0994348
Levulinic acid	0.700452	0.234167	Catechin	0.809579	0.101051	Shinflavanone	0.700907	0.169739
Azelaic acid	0.70016	0.34695	Nicotinic acid	0.807715	0.69403	Adenine	0.697651	0.250314
Retinoic acid	0.693828	0.0761329	L-Proline	0.798893	0.100803	L-Leucine	0.697332	0.482558
Aspartylphenylalanine	0.692985	0.644535	Methylgallate	0.790258	0.29051	Corchorifatty acid F	0.687375	0.350006
Cyanidin 3-(6''-malonylglucoside)	0.669161	0.309668	Kaempferol 3-(6-acetylgalactoside)	0.784535	0.47452	Glutamylleucine	0.684565	0.0361222
Nicotinic acid	0.665248	0.191055	Maltopentaose	0.778746	0.65322	Homocysteine	0.681243	0.0843297
D-Sedoheptulose 7-phosphate	0.650924	0.0402032	Palmitoleic acid	0.763976	0.282503	Thymidine	0.674971	0.0792302
L-Phenylalanine	0.650834	0.317187	L-Theanine	0.753105	0.344671	Pantothenic acid	0.673613	0.134071
Kaempferol 3-(6-acetylgalactoside)	0.650589	0.251154	Cyanidin 3-(6''-malonylglucoside)	0.745686	0.369475	Glucose 6-phosphate	0.672731	0.113558
Ophthalmic acid	0.641394	0.0598468	16-Hydroxyhexadecanoic acid	0.739496	0.367587	Abscisic acid	0.667643	0.438323
Deoxyribose	0.639856	0.316195	Glutamylleucine	0.738341	0.402874	Glutamine	0.648027	0.432946
Benzoic acid	0.633603	0.367181	Soyasaponin I	0.729025	0.261644	Homovanillic acid	0.63306	0.273988
Quercetin 3-arabinoside 7-glucoside	0.626608	0.211723	L-Lactic acid	0.728927	0.0363875	Fumaric acid	0.619976	0.0202905
Methyl acetate	0.625809	0.0142216	Guanosine	0.72552	0.146285	L-Arabitol	0.618601	0.0535451
Glutamine	0.624402	0.158212	Shinflavanone	0.723958	0.373295	Argininosuccinic acid	0.61742	0.5026
Cinnamic acid	0.619665	0.320505	N-Acetyl-L-glutamate 5-semialdehyde	0.722844	0.000457354	Formononetin	0.615406	0.275449
Rutin	0.61847	0.260064	Deoxycholic acid	0.715858	0.035835	Avicularin	0.608019	0.024635
Linolenic acid	0.607315	0.00206302	Quercetin 3-(6''-acetylglucoside)	0.715219	0.359371	Tetradecanedioic acid	0.602948	0.459289
Allantoic acid	0.603184	0.604572	Glucoliquiritin apioside	0.699436	0.377497	Salicylic acid	0.594583	0.14693
L-Aspartic acid	0.60094	0.423735	Jasmonic acid	0.695615	0.507697	Pipecolic acid	0.590591	0.00998662
Eriodictyol	0.592951	0.427208	Pantothenic acid	0.687091	0.0130938	Mevalonic acid	0.581921	0.0636231
Aminoadipic acid	0.586835	0.311999	D-Fructose	0.683011	0.021666	3-Hydroxynonanoic acid	0.568207	0.313224
L-Theanine	0.586536	0.144659	Rhein	0.663697	0.459607	Xanthosine	0.563216	0.0487315
Gentisic acid	0.586393	0.22775	Quercetin 3-(6''-malonyl-glucoside)	0.657779	0.309338	Gentisic acid	0.560217	0.3474
Traumatic acid	0.563067	0.307312	Quercitrin	0.657039	0.377519	16-Hydroxyhexadecanoic acid	0.54756	0.119996
Traumatin	0.561729	0.436233	L-Arabitol	0.655881	0.131726	Isopropylmaleic acid	0.543996	0.171614
Garcinia acid	0.552388	0.299292	Deoxyribose	0.651601	0.371014	Undecylenic acid	0.53693	0.290836
Methylmalonic acid	0.509022	0.0716941	Ascorbalamic acid	0.643729	0.0184694	Tryptophan	0.535392	0.043497
Guanine	0.505067	0.202291	Glutaric acid	0.629366	0.125755	Indole	0.521472	0.015783
Adipic acid	0.493499	0.470584	Syringic acid	0.624583	0.0133581	Dicumarol	0.517146	0.0168585
Glucose 6-phosphate	0.487221	0.182038	Homovanillic acid	0.622542	0.256468	Oxoadipic acid	0.46887	0.0185626
Uridine 5'-monophosphate	0.484481	0.0357677	Xanthosine	0.607111	0.152205	2-Ketobutyric acid	0.460141	0.0349046
Shikimic acid	0.48365	0.184009	L-Asparagine	0.602468	0.192266	D-Sedoheptulose 7-phosphate	0.458522	0.0259818
Soyasaponin V	0.478911	0.301087	6-Hydroxyhexanoic acid	0.579546	0.369347	Quercitrin	0.449955	0.30711
Dodecanedioic acid	0.464395	0.275053	Proanthocyanidin A2	0.564673	0.0983816	Dibutyl malate	0.447979	0.0199346
Dibutyl malate	0.457464	0.00846921	Camphoric acid	0.562285	0.170415	Traumatin	0.443308	0.296614
Soyasaponin I	0.438507	0.274389	L-Histidine	0.539392	0.122892	Methylgallate	0.437281	0.323215
Uracil	0.43848	0.368403	Procyanidin B1	0.536958	0.126015	Deoxyribose	0.427977	0.0370622
Camphoric acid	0.420849	0.044926	Xanthine	0.534256	0.250411	Linamarin	0.420382	0.202861
5-Hydroxy-L-tryptophan	0.366824	0.0103849	Quercetin	0.527362	0.111924	Uracil	0.414857	0.0904589
Abscisic acid	0.330146	0.0887682	Quercetin 4'-glucoside	0.485764	0.0299743	Threonic acid	0.410318	0.0711049
3-Hydroxynonanoic acid	0.306859	0.187705	Vanilloloside	0.44258	0.0642378	3-Oxododecanoic acid	0.367831	0.195666
Soyasaponin A1	0.286024	0.336697	Allantoic acid	0.436179	0.130377	Allantoic acid	0.339749	0.0538258
3-Oxododecanoic acid	0.252918	0.253848	Formononetin	0.410859	0.128681	Dodecanedioic acid	0.240012	0.165861
Avicularin	0.136183	0.00237337	Rutin	0.396315	0.116216	Terephthalic acid	0.165557	0.173179
Terephthalic acid	0.0122777	0.0278774	Ribosylzeatin phosphate	0.253225	0.0708233	Rhein	0.0154702	0.37858
