# Supplementary material for: Comparative Analysis of Untargeted Metabolomics in Tolerant and Sensitive Genotypes of Common Bean (Phaseolus vulgaris L.) Seeds Exposed to Terminal Drought Stress
Source: Metabolites. 2022 Oct 5;12(10):944. doi: 10.3390/metabo12100944 (PMC9607437; doi:10.3390/metabo12100944)
Supplement: Supplementary file 1 [file metabolites-12-00944-s001.zip › Table S4.xlsx]

## Sheet: Table S4 (FC>2)
Negative ionization				Positive ionization
A1 vs X1	B1 vsY1	C1 vs Z1		A1 vs X1	B1 vs Y1	C1 vs Z1
Ribosylzeatin phosphate	Cosmosiin	Cyanidin 3-sambubioside		Glutamylglutamic acid	Cosmosiin	N,N-Dimethylformamide
Syringic acid	Eriodictyol	Quercetin 3-arabinoside 7-glucoside		Sinapic acid	Abscisic acid	Piperidine
Piscidic acid	Mevalonic acid	Luteolin		Homocysteine	Vicenin 2	Isocrotonic acid
Jasmonic acid	Vanillin	Xanthine		Pyridoxine	9-Oxo-nonanoic acid	2-Aminoacrylic acid
Oxoadipic acid	Salicylic acid	Procyanidin B1		Ferulic acid	Erythritol	Ethyl acetate
Thymidine	Naringenin	Soyasaponin A1				L-Alanine
Pyroglutamic acid	Guanine	Ferulic acid				2-Furancarboxaldehyde
	9,10-DHOME	Rutin
	10,16-Dihydroxyhexadecanoic acid	Quercetin
	Aspartylphenylalanine	L-Aspartic acid
	Tetradecanedioic acid	Syringic acid
	Soyasaponin A1
	6-Hydroxypentadecanedioic acid
	Abscisic acid
	Traumatin
