# Supplementary material for: Comparative Analysis of Untargeted Metabolomics in Tolerant and Sensitive Genotypes of Common Bean (Phaseolus vulgaris L.) Seeds Exposed to Terminal Drought Stress
Source: Metabolites. 2022 Oct 5;12(10):944. doi: 10.3390/metabo12100944 (PMC9607437; doi:10.3390/metabo12100944)
Supplement: Supplementary file 1 [file metabolites-12-00944-s001.zip › Table S5 .xlsx]

## Sheet: Table S5 (VIP>1.5)
Negative ionization			Positive ionization
A1 vs X1	B1 vs Y1	C1 vs Z1	A1 vs X1	B1 vs Y1	C1 vs Z1
Linolenic acid	N-Acetyl-L-glutamate 5-semialdehyde	D-Glucuronic acid	Linolenic acid	Procyanidin	Aminocyclopropanecarboxylic acid
Avicularin	Eriodictyol	Soyasaponin A1	Homocysteine	N-Acetyl-L-alanine	Retinoic acid
Homocysteine	Vanillin	Quercetin 3-arabinoside 7-glucoside	Glutamylmethionine	Itaconic acid	Pyridoxine
Phosphate	6-Phosphogluconic acid	Syringic acid	5-Hydroxy-L-tryptophan	L-Threonine	Isocrotonic acid
Ribosylzeatin phosphate	Pantothenic acid	Pipecolic acid	Ferulic acid	Pantothenic acid	L-Lysine
Dibutyl malate	Syringic acid	Necatorine	Nicotine	Cosmosiin	Trehalose
Pyroglutamic acid	Ascorbalamic acid	Ribosylzeatin phosphate	Retinoic acid	Erythritol	Ophthalmic acid
Xylose	Levulinic acid	Xanthine	Ophthalmic acid	2-Aminoacrylic acid	Trigonelline
5-Hydroxy-L-tryptophan	D-Fructose	Indole	Pyridoxine	L-Alanine	L-Aspartic acid
Gluconic acid	Quercetin 4'-glucoside	Dicumarol	D-Fructose	trans-Aconitic acid	2-Furancarboxaldehyde
Methyl acetate	gamma-Glutamyltyrosine	Oxoadipic acid	Citric acid	Glutaric acid	Rutin
N-Acetyl-L-glutamate 5-semialdehyde	Deoxycholic acid	Dibutyl malate	Indole-3-carboxaldehyde	Glutamylserine	Sinapic acid
D-Glucuronic acid	L-Lactic acid	Fumaric acid	L-Alanine	Aminocyclopropanecarboxylic acid	Vanillin
Terephthalic acid	Cosmosiin	Rutin	Salicylic acid	Piperidine	Scoparone
Ascorbalamic acid	Methylmalonic acid	L-Proline	Procyanidin	Furaneol	Allantoic acid
Uridine 5'-monophosphate	L-Threonine	Cyanidin 3-sambubioside		Ophthalmic acid	5-Hydroxy-L-tryptophan
D-Sedoheptulose 7-phosphate	Vanilloloside	Avicularin		Soyasaponin I	Ferulic acid
Camphoric acid	trans-Aconitic acid	D-Sedoheptulose 7-phosphate		Rutin	3-Methylcyclohexanethiol
Ophthalmic acid	Cortexolone	2-Ketobutyric acid		Nicotinic acid	Adenine
Cortexolone	Ribosylzeatin phosphate	Glutamylleucine		Glutamylleucine
4-Acetamidobutanoic acid	Traumatic acid	Deoxyribose		Argininosuccinic acid
Oxoglutaric acid	2-Methylcitric acid	Adipic acid		Allantoic acid
Cytidine	Linamarin	D-Fructose		Pyroglutamic acid
	Glutamylglutamic acid	Tryptophan		Soyasaponin V
	Proanthocyanidin A2	Xanthosine
		L-Aspartic acid
		L-Arabitol
		Allantoic acid
