# Supplementary material for: Comparative Analysis of Untargeted Metabolomics in Tolerant and Sensitive Genotypes of Common Bean (Phaseolus vulgaris L.) Seeds Exposed to Terminal Drought Stress
Source: Metabolites. 2022 Oct 5;12(10):944. doi: 10.3390/metabo12100944 (PMC9607437; doi:10.3390/metabo12100944)
Supplement: Supplementary file 1 [file metabolites-12-00944-s001.zip › Table S6.xlsx]

## Sheet: Table S6
Negative ionization						Positive ionization
A1 vs X1	p-value	B1 vs Y1	p-value	C1 vs Z1	p-value	A1 vs X1 (Positive)	p-value	B1 vs Y1	C1 vs Z1	p-value
Monobactam biosynthesis	0.050304	Flavone and flavonol biosynthesis	0.00098758	Pentose phosphate pathway	0.0073327	Cysteine and methionine metabolism	0.0098777	No Metabolic Pathway	Flavone and flavonol biosynthesis	0.001826
Sulfur metabolism	0.092461	Pentose and glucuronate interconversions	0.070657	C5-Branched dibasic acid metabolism	0.042084	Vitamin B6 metabolism	0.038646		Cysteine and methionine metabolism	0.025971
Pentose phosphate pathway	0.1158	Pyrimidine metabolism	0.15215	Flavone and flavonol biosynthesis	0.082568	Sulfur metabolism	0.052399		Flavonoid biosynthesis	0.027047
Citrate cycle (TCA cycle)	0.12155	Flavonoid biosynthesis	0.1852	Butanoate metabolism	0.11512	Phenylpropanoid biosynthesis	0.11882		Monobactam biosynthesis	0.044826
Carbon fixation in photosynthetic organisms	0.12726	Amino sugar and nucleotide sugar metabolism	0.19598	Arginine biosynthesis	0.12151				Lysine biosynthesis	0.050304
Pyruvate metabolism	0.13295			Lysine degradation	0.12151				Vitamin B6 metabolism	0.061177
Tryptophan metabolism	0.1386			Propanoate metabolism	0.13415				Nicotinate and nicotinamide metabolism	0.071941
Glutathione metabolism	0.16087			Citrate cycle (TCA cycle)	0.13415				Arginine biosynthesis	0.09838
Glyoxylate and dicarboxylate metabolism	0.17182			Carbon fixation in photosynthetic organisms	0.14041				beta-Alanine metabolism	0.09838
Pyrimidine metabolism	0.21952			Alanine, aspartate and glutamate metabolism	0.14663				Carbon fixation in photosynthetic organisms	0.11392
Purine metabolism	0.33946			Valine, leucine and isoleucine biosynthesis	0.14663				Alanine, aspartate and glutamate metabolism	0.11905
				Tryptophan metabolism	0.15281				Cyanoamino acid metabolism	0.13931
				Glyoxylate and dicarboxylate metabolism	0.18905				Glycine, serine and threonine metabolism	0.17378
				Glycine, serine and threonine metabolism	0.21243				Phenylpropanoid biosynthesis	0.18341
				Pyrimidine metabolism	0.24079				Aminoacyl-tRNA biosynthesis	0.23461
				Cysteine and methionine metabolism	0.28427
				Purine metabolism	0.36931
